# Supplementary material
Source: publisher figshare collection journal article supplement (https://sage.figshare.com/ndownloader/files/14501372)
Supplement: Supplementary file 1 [file 14501372]

# **Job satisfaction and bad jobs: Why are cleaners so happy at work?**

**Alexandre Léné**

## **Statistical appendix**

### **Appendix 1: the Cleaners sample**

|                                                                  | <b>N</b> | <b>%</b> |
|------------------------------------------------------------------|----------|----------|
| Domestic Cleaners and Helpers                                    | 998      | 34.71    |
| Cleaners and Helpers in Offices, Hotels and Other Establishments | 1408     | 48.97    |
| Window Cleaners                                                  | 1        | 0.03     |
| Garbage and Recycling Collectors                                 | 56       | 1.95     |
| Refuse Sorters                                                   | 1        | 0.03     |
| Sweepers and Related Labourers                                   | 7        | 0.24     |
| Odd-job Persons                                                  | 403      | 14.02    |

N = 2874

Source: *DARES Working Conditions survey, 2013*

## Appendix 2: descriptive statistics

|                                                                                               | Total population | Cleaning |
|-----------------------------------------------------------------------------------------------|------------------|----------|
| <b>Proportion of women</b>                                                                    | 49.8%            | 80.5%    |
| <b>Average age</b>                                                                            | 41.2             | 45.6     |
| <b>Level of education</b>                                                                     |                  |          |
| College certificate                                                                           | 15.5%            | 44.3%    |
| CAP-BEP qualifications                                                                        | 27.2%            | 41.5%    |
| <i>Bac</i> school leaving certificate (general or vocational)                                 | 18.1%            | 10.7%    |
| <i>Bac</i> school leaving certificate + 2 years' higher education                             | 14.3%            | 2.1%     |
| <i>Bac</i> school leaving certificate + 3 or more years' higher education                     | 24.9%            | 1.5%     |
| <b>Monthly income</b>                                                                         |                  |          |
| between 0 and 999€                                                                            | 14.8%            | 48.1%    |
| between 1000 and 1499€                                                                        | 27.9%            | 36.1%    |
| between 1500 and 1999€                                                                        | 25.4%            | 13.2%    |
| between 2000 and 2999€                                                                        | 20.3%            | 2.0%     |
| more than 3000€                                                                               | 11.5%            | 0.6%     |
| <b>State of health</b>                                                                        |                  |          |
| Very good                                                                                     | 25.9%            | 15.3%    |
| Good                                                                                          | 50.2%            | 47.8%    |
| Fairly good                                                                                   | 19.1%            | 25.6%    |
| Poor                                                                                          | 4.3%             | 9.9%     |
| Very poor                                                                                     | 0.6%             | 1.4%     |
| <b>Born abroad</b>                                                                            | 10.5%            | 18.1%    |
| <b>Has a permanent contract</b>                                                               | 84.8%            | 76.9%    |
| <b>Works part-time</b>                                                                        | 19.3%            | 51.7%    |
| <b>The working day is normally split into 2 periods separated by a gap of 3 hours or more</b> | 6.5%             | 13.9%    |
| <b>Obligated to remain standing for long periods of time</b>                                  | 50.8%            | 87.4%    |
| <b>Obligated to maintain an awkward or tiring posture over a long period</b>                  | 34.5%            | 55.5%    |
| <b>Works in a dirty environment</b>                                                           | 28.8%            | 50.7%    |
| <b>The work involves continually repeating the same series of motions or operations</b>       | 41.7%            | 69.9%    |

weighted data

Source: *DARES Working Conditions survey, 2013*

### Appendix 3 Average satisfaction score by socio-occupational category

|                                                                              | N    | Average |
|------------------------------------------------------------------------------|------|---------|
| Liberal professions                                                          | 96   | 0.97    |
| cleaners                                                                     | 2874 | 0.78    |
| Agricultural workers                                                         | 240  | 0.67    |
| Managerial staff working in the public sector                                | 806  | 0.56    |
| Secondary school teachers, scientific professions                            | 1345 | 0.49    |
| Professions linked to information, the arts and entertainment                | 224  | 0.48    |
| Civil servants and general duty personnel working in the public sector       | 4410 | 0.43    |
| Intermediate occupations in healthcare and social work                       | 2552 | 0.40    |
| Skilled craft-type manual workers                                            | 1392 | 0.30    |
| Engineers and technical managers working in the private sector               | 970  | 0.30    |
| Primary school teachers and employees of similar status                      | 1145 | 0.21    |
| Intermediate administrative occupations in the public sector                 | 974  | -0.01   |
| Foremen, supervisors                                                         | 594  | -0.29   |
| Administrative staff working in the private sector                           | 1577 | -0.37   |
| Police and military                                                          | 669  | -0.38   |
| Unskilled craft-type manual workers                                          | 665  | -0.40   |
| Intermediate administrative and commercial occupations in the private sector | 1762 | -0.57   |
| Technicians                                                                  | 1246 | -0.59   |
| Drivers                                                                      | 573  | -0.76   |
| Employees working in the retail industry                                     | 1071 | -1.53   |
| Skilled manual workers employed in handling, warehousing and transportation  | 403  | -1.73   |
| Skilled industrial-type manual workers                                       | 1097 | -1.73   |
| Unskilled industrial-type manual workers                                     | 799  | -2.01   |

Source: *DARES Working Conditions survey, 2013*

#### Appendix 4 Estimation of the determinants of job satisfaction

|                                                                           | POLS           |                | Endogeneity corrected<br>IV approach |                |
|---------------------------------------------------------------------------|----------------|----------------|--------------------------------------|----------------|
|                                                                           | Estim.<br>Val. | Stand.<br>Dev. | Estim.<br>Val.                       | Stand.<br>Dev. |
| Intercept                                                                 | -3.012 ***     | (0.655)        | -2.429 ***                           | (0.752)        |
| Cleaning                                                                  | 0.478 ***      | (0.180)        | 0.464 ***                            | (0.180)        |
| Man                                                                       | -0.194 *       | (0.099)        | 0.036                                | (0.184)        |
| Age                                                                       | 0.059 **       | (0.024)        | 0.054 **                             | (0.024)        |
| Age squared                                                               | -0.001         | (0.001)        | -0.001                               | (0.001)        |
| CAP-BEP qualifications                                                    | -0.236         | (0.143)        | -0.127                               | (0.165)        |
| <i>Bac</i> school leaving certificate (general or vocational)             | -0.767 ***     | 0.156)         | -0.460 *                             | (0.259)        |
| <i>Bac</i> school leaving certificate + 2 years' higher education         | -0.998 ***     | (0.172)        | -0.520                               | (0.366)        |
| <i>Bac</i> school leaving certificate + 3 or more years' higher education | -0.952 ***     | (0.169)        | -0.324                               | (0.444)        |
| Poor state of health                                                      | -1.075 ***     | (0.053)        | -1.105 ***                           | (0.057)        |
| Born abroad                                                               | 0.567 ***      | (0.149)        | 0.498 ***                            | (0.155)        |
| Living as a couple                                                        | 0.012          | (0.107)        | 0.017                                | (0.107)        |
| Lives in the Ile-de-France region                                         | -0.168         | (0.117)        | -0.157                               | (0.117)        |
| Currently the main breadwinner of the household                           | 0.203 *        | (0.103)        | 0.221 **                             | (0.104)        |
| No. of children aged under 3                                              | -0.191         | (0.119)        | -0.161                               | (0.118)        |
| No. of children aged between 3 and 17                                     | 0.061          | (0.045)        | 0.051                                | (0.046)        |
| No. of children aged 17 and over                                          | 0.172 *        | (0.095)        | 0.156 *                              | (0.095)        |
| Length of service                                                         | -0.002 ***     | (0.001)        | -0.002 ***                           | (0.001)        |
| Apprenticeship contract                                                   | 0.439          | (0.388)        | 0.456                                | (0.388)        |
| Temporary work                                                            | 0.102          | (0.372)        | 0.090                                | (0.371)        |
| Intern                                                                    | 0.539          | (0.678)        | 0.569                                | (0.682)        |
| Fixed-term contract                                                       | 0.574 ***      | (0.161)        | 0.534 ***                            | (0.162)        |
| Size of workforce: 1 to 4 employees                                       | 0.120          | (0.208)        | 0.131                                | (0.206)        |
| Size of workforce: 5 to 9                                                 | 0.080          | (0.164)        | 0.085                                | (0.163)        |
| Size of workforce: 10 to 19                                               | -0.126         | (0.138)        | -0.124                               | (0.138)        |
| Size of workforce: 20 to 49                                               | -0.240 *       | (0.136)        | -0.237 *                             | (0.135)        |
| Size of workforce: 200 to 499                                             | -0.151         | (0.137)        | -0.145                               | (0.137)        |
| Size of workforce: 500 to 999                                             | -0.406 **      | (0.165)        | -0.398 **                            | (0.165)        |
| Size of workforce: 1,000 or more                                          | -0.112         | (0.137)        | -0.103                               | (0.136)        |
| Monthly earnings < €1,000 (ref.)                                          | -              |                | -                                    |                |
| Monthly earnings €1,000 - €1500                                           | -0.689 ***     | (0.170)        | -0.684 ***                           | (0.169)        |
| Monthly earnings €1500 - €2,000                                           | -0.726 ***     | (0.185)        | -0.711 ***                           | (0.185)        |
| Monthly earnings €2,000 - €3,000                                          | -0.517 ***     | (0.194)        | -0.495 **                            | (0.195)        |

|                                                                                                                                                           | POLS           |                | Endogeneity corrected<br>IV approach |                |
|-----------------------------------------------------------------------------------------------------------------------------------------------------------|----------------|----------------|--------------------------------------|----------------|
|                                                                                                                                                           | Estim.<br>Val. | Stand.<br>Dev. | Estim.<br>Val.                       | Stand.<br>Dev. |
| Monthly earnings > €3,000                                                                                                                                 | -0.211         | (0.230)        | -0.183                               | (0.232)        |
| Belongs to a trade union                                                                                                                                  | -0.478 ***     | (0.132)        | -0.483 ***                           | (0.131)        |
| Is a trade union sympathiser                                                                                                                              | -0.329 **      | (0.167)        | -0.334 **                            | (0.168)        |
| The position held corresponds to the training received                                                                                                    | 1.241 ***      | (0.098)        | 1.244 ***                            | (0.098)        |
| Certain skills needed to do the work properly are lacking                                                                                                 | -0.603 ***     | (0.084)        | -0.604 ***                           | (0.085)        |
| Some skills are not used                                                                                                                                  | -1.318 ***     | (0.087)        | -1.321 ***                           | (0.087)        |
| Part-time work                                                                                                                                            | -0.081         | (0.130)        | -0.084                               | (0.129)        |
| Occasionally works on Saturdays                                                                                                                           | -0.059         | (0.124)        | -0.056                               | (0.123)        |
| Usually works on Saturdays                                                                                                                                | -0.205         | (0.144)        | -0.203                               | (0.144)        |
| Occasionally works on Sundays                                                                                                                             | 0.210          | (0.142)        | 0.204                                | (0.142)        |
| Usually works on Sundays                                                                                                                                  | 0.311 *        | (0.174)        | 0.307 *                              | (0.174)        |
| Occasionally works in the evening                                                                                                                         | -0.071         | (0.126)        | -0.065                               | (0.125)        |
| Usually works in the evening                                                                                                                              | -0.057         | (0.159)        | -0.049                               | (0.159)        |
| Occasionally works at night                                                                                                                               | 0.091          | (0.189)        | 0.091                                | (0.188)        |
| Usually works at night                                                                                                                                    | 0.008          | (0.204)        | -0.003                               | (0.203)        |
| If any unexpected situations arise, I can't easily leave my work for a brief period of time                                                               | -0.486 ***     | (0.106)        | -0.488 ***                           | (0.106)        |
| If any unexpected situations arise, I can't leave my work for a brief period of time                                                                      | -0.613 ***     | (0.178)        | -0.615 ***                           | (0.178)        |
| Works every day beyond the set hours                                                                                                                      | -0.121         | (0.147)        | -0.113                               | (0.147)        |
| Often works beyond the set hours                                                                                                                          | -0.013         | (0.113)        | -0.011                               | (0.113)        |
| Never works beyond the set hours                                                                                                                          | 0.352 ***      | (0.115)        | 0.350 ***                            | (0.114)        |
| Does not know the hours they will have to work next month                                                                                                 | -0.244 **      | (0.114)        | -0.242 **                            | (0.114)        |
| Obligated to remain standing for long periods of time                                                                                                     | 0.436 ***      | (0.109)        | 0.437 ***                            | (0.109)        |
| Obligated to maintain an awkward or tiring posture over a long period                                                                                     | -0.584 ***     | (0.107)        | -0.584 ***                           | (0.107)        |
| Obligated to undertake long or frequent journeys on foot                                                                                                  | -0.006         | (0.100)        | -0.008                               | (0.100)        |
| Works in a dirty environment                                                                                                                              | -0.848 ***     | (0.106)        | -0.850 ***                           | (0.106)        |
| Obligated to make painful or tiring movements                                                                                                             | -0.349 ***     | (0.116)        | -0.348 ***                           | (0.115)        |
| Has to pay attention to visual or acoustic signals that are brief, unpredictable or difficult to detect                                                   | 0.234 **       | (0.109)        | 0.235 **                             | (0.109)        |
| An error in your work might result in sanctions being taken against you (risk of losing your job, a significant reduction in your remuneration or income) | -0.756 ***     | (0.102)        | -0.754 ***                           | (0.102)        |
| Pace of work imposed by the automatic operating speed of a machine                                                                                        | -0.345 *       | (0.185)        | -0.344 *                             | (0.184)        |

|                                                                                                                       | POLs           |                | Endogeneity corrected<br>IV approach |                |
|-----------------------------------------------------------------------------------------------------------------------|----------------|----------------|--------------------------------------|----------------|
|                                                                                                                       | Estim.<br>Val. | Stand.<br>Dev. | Estim.<br>Val.                       | Stand.<br>Dev. |
| The pace of work is imposed by checks or constant supervision (or at least daily checks) performed by line management | -0.695 ***     | (0.099)        | -0.697 ***                           | (0.099)        |
| The pace of work is imposed by computerised monitoring                                                                | -0.396 ***     | (0.091)        | -0.393 ***                           | (0.091)        |
| The work involves continually repeating the same series of motions or operations                                      | -0.363 ***     | (0.097)        | -0.368 ***                           | (0.096)        |
| Can briefly interrupt their work when they want to                                                                    | 0.290 ***      | (0.104)        | 0.294 ***                            | (0.104)        |
| Is entitled to make changes to the deadlines set                                                                      | 0.059          | (0.088)        | 0.059                                | (0.088)        |
| Is asked to do an excessive amount of work                                                                            | 0.120          | (0.120)        | 0.124                                | (0.120)        |
| Is in direct contact with the public                                                                                  | 1.099 ***      | (0.108)        | 1.099 ***                            | (0.108)        |
| Making an error in the work might have serious consequences for the quality of the service or product                 | -0.059         | (0.102)        | -0.059                               | (0.101)        |
| Making an error in the work might result in hazardous consequences for the person themselves or for others            | 0.756 ***      | (0.101)        | 0.753 ***                            | (0.101)        |
| Has the opportunity to deal collectively with organisational issues                                                   | 0.227 *        | (0.122)        | 0.229 *                              | (0.122)        |
| My superior listens to me                                                                                             | 1.517 ***      | (0.062)        | 1.519 ***                            | (0.062)        |
| Assistance available from superior where problems are encountered in carrying out a difficult task                    | 0.651 ***      | (0.095)        | 0.650 ***                            | (0.095)        |
| Assistance available from work colleagues where problems are encountered in carrying out a difficult task             | -0.225 *       | (0.120)        | -0.225 *                             | (0.119)        |
| Experiences tensions in their dealings with the public                                                                | -0.611 ***     | (0.101)        | -0.613 ***                           | (0.101)        |
| Experiences tensions in their dealings with colleagues                                                                | -0.985 ***     | (0.104)        | -0.986 ***                           | (0.104)        |
| Experiences tensions in their dealings with the persons they are supervising                                          | -0.065         | (0.136)        | -0.061                               | (0.136)        |
| R <sup>2</sup>                                                                                                        |                | 0.35           |                                      | 0.35           |
| N                                                                                                                     |                | 26353          |                                      | 26353          |

This table sets out the results of the estimation of the determinants of satisfaction (POLs and IV method).  
 \*\*\*p < 0.01; \*\*p < 0.05; \*p < 0.10.

Weighted data. To obtain convergent estimators of the standard deviations (in brackets), we used the SAS surveyreg procedure.

Source: *DARES Working Conditions survey, 2013*
